# Supplementary material for: Non-doped and doped circularly polarized organic light-emitting diodes with high performances based on chiral octahydro-binaphthyl delayed fluorescent luminophores
Source: Royal Society of Chemistry journal article supplement (doi:10.1039/c9tc01632e), 2019-01-01
Supplement: c9tc01632e1.pdf [file c9tc01632e1.pdf]

## Supporting Information

### **Non-doped and doped circularly polarized organic light-emitting diodes with high performances based on chiral octahydro-binaphthyl delayed fluorescence luminophores**

Zheng-Guang Wu, Zhi-Ping Yan, Xu-Feng Luo, Li Yuan, Wei-Qiu Liang, Yi Wang, You-Xuan Zheng,\* Jing-Lin Zuo and Yi Pan

State Key Laboratory of Coordination Chemistry, Collaborative Innovation Center of Advanced Microstructures, Jiangsu Key Laboratory of Advanced Organic Materials, School of Chemistry and Chemical Engineering, Nanjing University, Nanjing, 210023, P. R. China

E-mail: yxzheng@nju.edu.cn

#### **1. General information**

##### **1.1 Materials, instruments and measurement**

NMR measurements were conducted on a Bruker AM 400 spectrometer. The mass spectra were recorded by Matrix Assisted Laser Desorption Ionization Time of Flight Mass Spectrometry (autoflex TOF/TOF, Bruker Daltonics). High-resolution mass spectra were recorded on a MICROTOF-Q III instrument. Absorption spectra were measured on a UV-3100 spectrophotometer and photoluminescence spectra were obtained from a Hitachi F-4600 photoluminescence spectrophotometer. Cyclic voltammetry measurements were conducted on a MPI-A multifunctional electrochemical and chemiluminescent system (Xi'an Remex Analytical Instrument Ltd. Co., China) at room temperature, with a polished Pt plate as the working electrode, platinum thread as the counter electrode and Ag-AgNO<sub>3</sub> (0.1 M) in CH<sub>3</sub>CN as the reference electrode, *tetra*-*n*-butylammonium perchlorate (0.1 M) was used as the supporting electrolyte, using Fc<sup>+</sup>/Fc as the internal standard, the scan rate was 0.1 V/s. The absolute photoluminescence quantum yields ( $\Phi$ ) and the decay lifetimes of the compounds was measured with HORIBA FL-3 fluorescence spectrometer. Thermogravimetric analysis (TGA) was performed on a Pyris 1 DSC under nitrogen at a heating rate of 10 °C min<sup>-1</sup>. The circular dichroism (CD) spectra were measured on a JASCO J-810 circular dichroism

spectropolarimeter with ‘Standard’ sensitivity. The scan speed was set as 200 nm/min with 1 nm resolution and a respond time of 1.0 s. The circularly polarized luminescence (CPPL) spectra were measured on a JASCO CPPL-300 spectrophotometer with ‘Standard’ sensitivity at 200 nm/min scan speed and respond time of 2.0 s employing “slit” mode.

## **1.2 Fabrication and measurement of CP-OLEDs**

Indium-tin-oxide (ITO) coated glass with a sheet resistance of  $10 \Omega \text{ sq}^{-1}$  was used as the anode substrate. Prior to film deposition, patterned ITO substrates were cleaned with detergent, rinsed in de-ionized water, dried in an oven, and finally treated with oxygen plasma for 5 minutes at a pressure of 10 Pa to enhance the surface work function of ITO anode (from 4.7 to 5.1 eV). All the organic layers were deposited with the rate of  $0.1 \text{ nm s}^{-1}$  under high vacuum ( $\leq 2 \times 10^{-5}$  Pa). The doped layers were prepared by co-evaporating dopant and host material from two individual sources, and the doping concentrations were modulated by controlling the evaporation rate of dopant. LiF and Al were deposited in another vacuum chamber ( $\leq 8.0 \times 10^{-5}$  Pa) with the rates of 0.01 and  $1 \text{ nm s}^{-1}$ , respectively, without being exposed to the atmosphere. The thicknesses of these deposited layers and the evaporation rate of individual materials were monitored in vacuum with quartz crystal monitors. A shadow mask was used to define the cathode and to make ten emitting dots (with the active area of  $10 \text{ mm}^2$ ) on each substrate. Device performances were measured by using a programmable Keithley source measurement unit (Keithley 2400 and Keithley 2000) with a silicon photodiode. The EL spectra were measured with a calibrated Hitachi F-7000 fluorescence spectrophotometer. Based on the uncorrected EL fluorescence spectra, the Commission Internationale de l'Eclairage (CIE) coordinates were calculated using the test program of Spectrascan PR650 spectrophotometer. The EQE of EL devices were calculated based on the photo energy measured by the photodiode, the EL spectrum, and the current pass through the device. The circularly polarized electroluminescence (CPEL) spectra were measured on a JASCO CPPL-300 spectrophotometer with ‘Standard’ sensitivity at 200 nm/min scan speed and respond time of 2.0 s employing “band” mode.

## 2. NMR Spectra

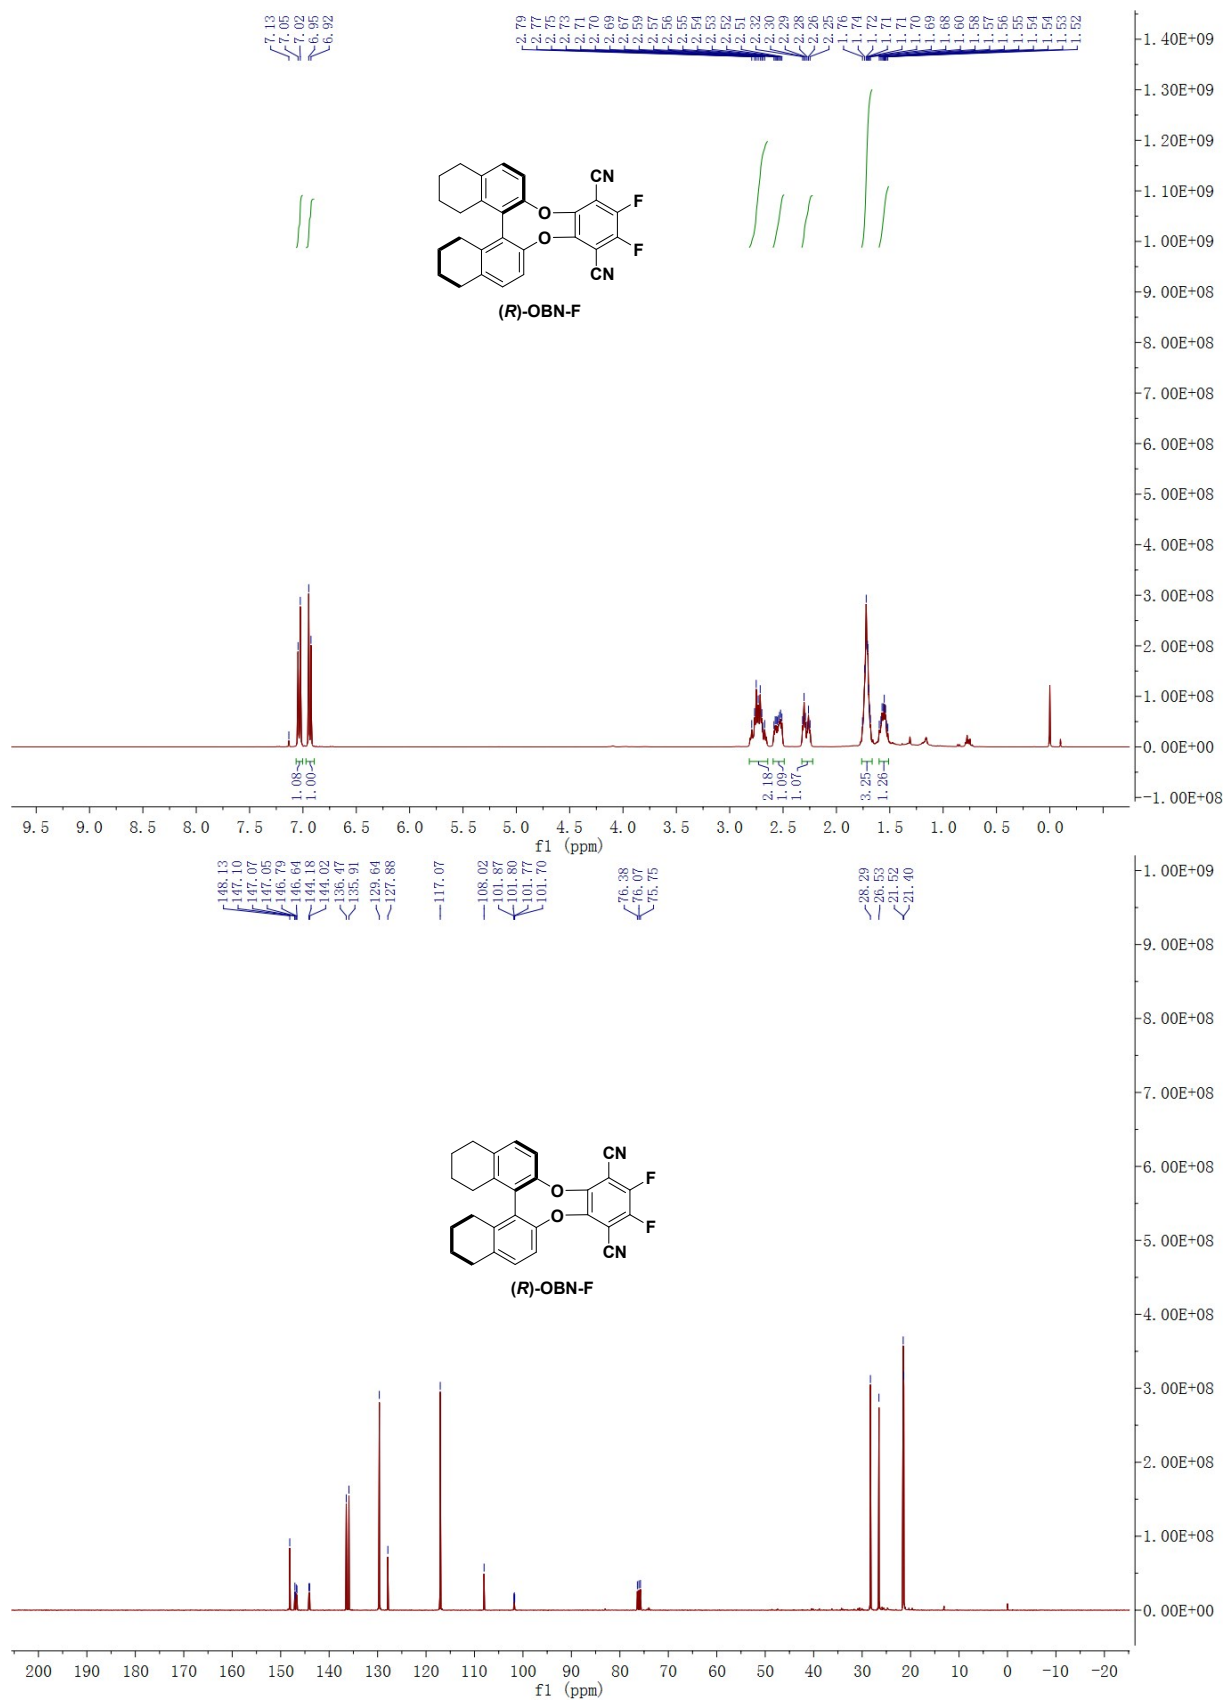

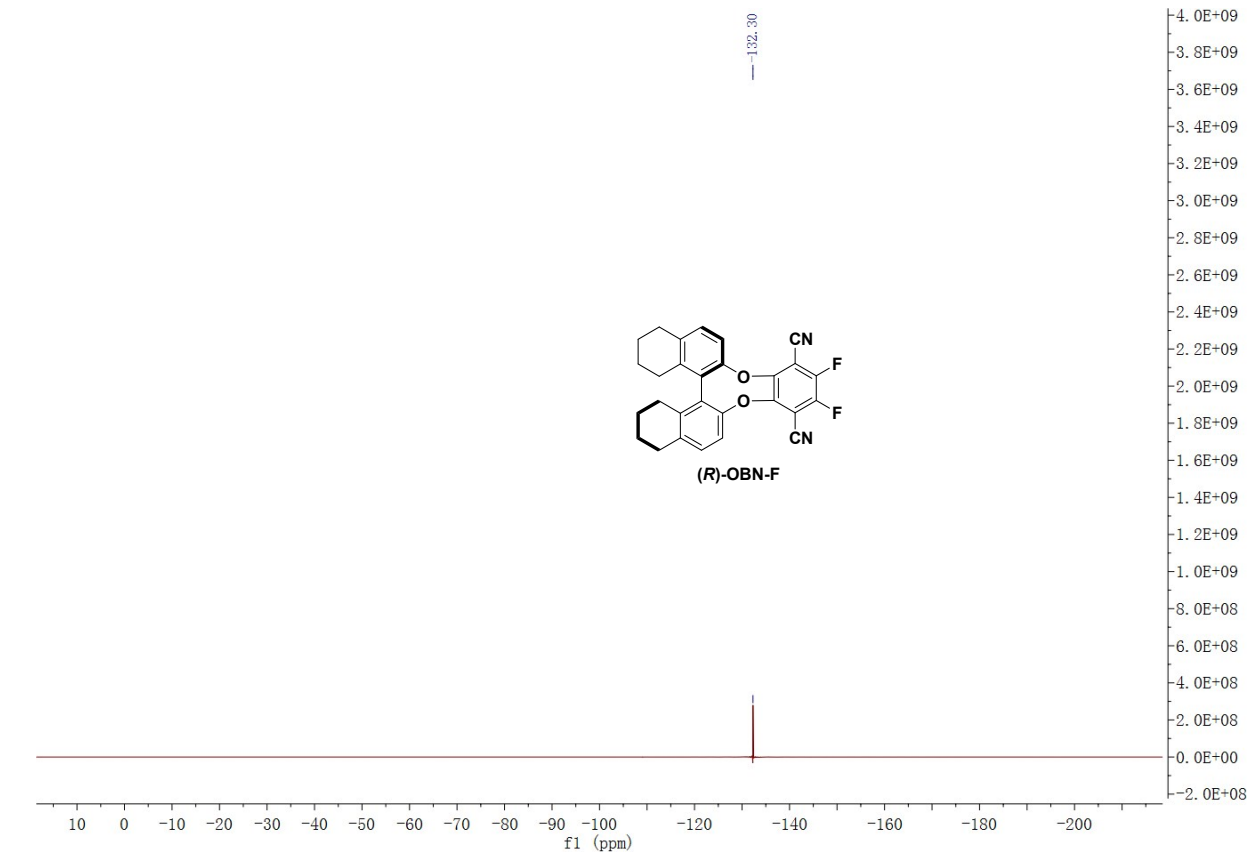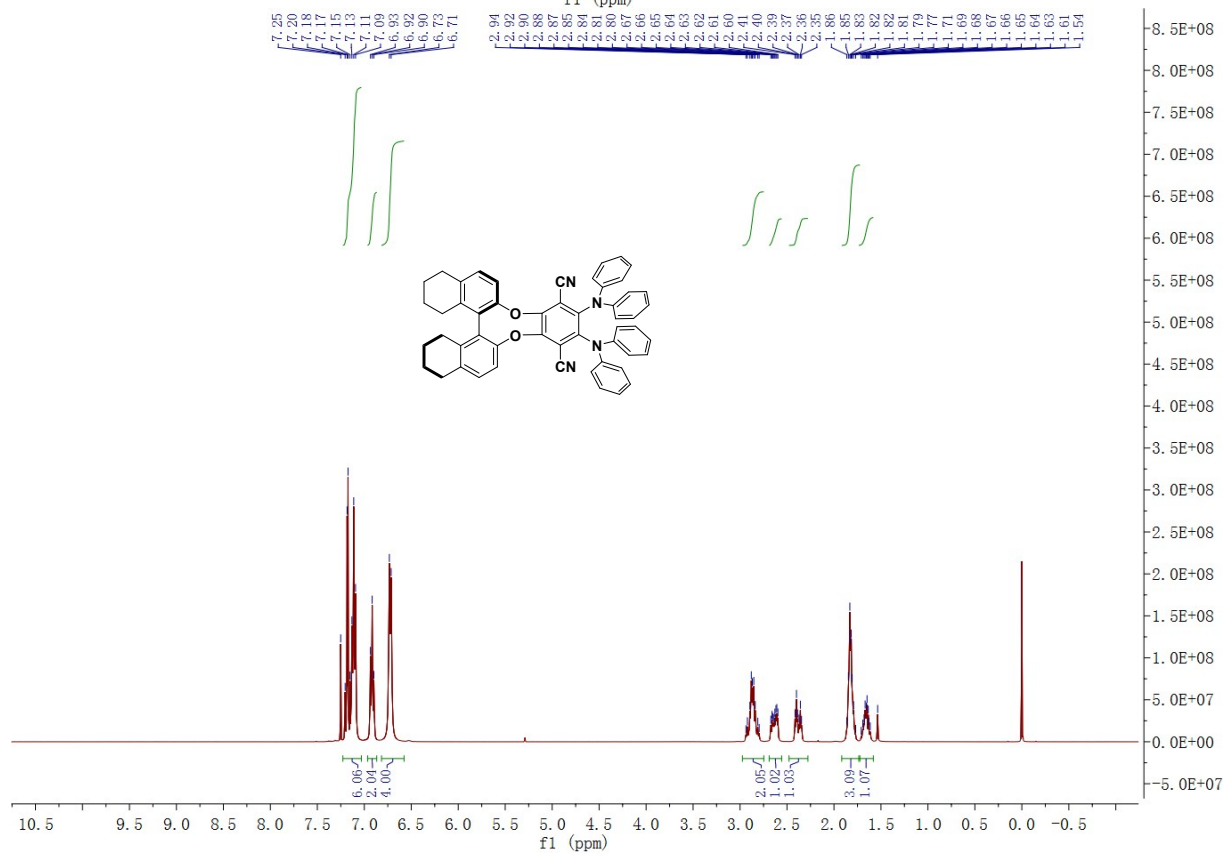

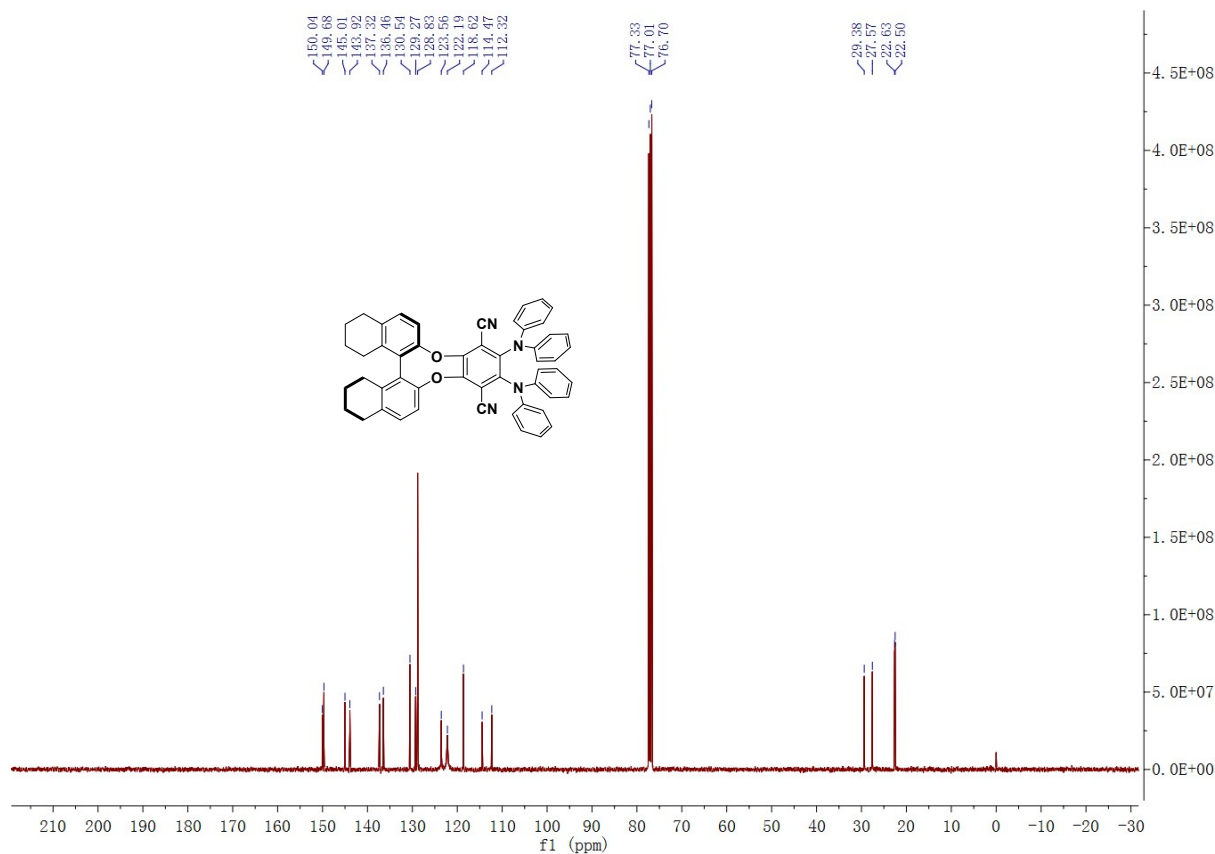

### 3. Supplementary data

**Table S1.** The devices performances of all reported CP-OLEDs vs this work by **(R/S)-OBN-DPA**.

| Materials              | Structures | Device models      | $\lambda_{em}$ [nm] | $ g_{et} $            | $\eta_{c,max}$ [ $cd A^{-1}$ ] | EQE % | Luminance [ $cd m^{-2}$ ] | Ref.                                                                                           |
|------------------------|------------|--------------------|---------------------|-----------------------|--------------------------------|-------|---------------------------|------------------------------------------------------------------------------------------------|
| BMB-PPV-co-BDMO-PPV    |            | Pure polymer layer | 600                 | $1.70 \times 10^{-3}$ | -                              | -     | -                         | <i>J. Am. Chem. Soc.</i> , <b>1997</b> , 119, 9909.                                            |
| (S)-PF4/1              |            | Pure polymer layer | 425±5               | 0.16                  | -                              | -     | -                         | <i>Macromolecules</i> , <b>2002</b> , 35, 6792.<br><i>Adv. Mater.</i> , <b>2000</b> , 12, 362. |
| (S)-PF4/1-co-PF8       |            |                    |                     | 0.05                  | -                              | -     |                           |                                                                                                |
| (S)-PF8/1/1            |            |                    |                     | 0.25                  | -                              | -     |                           |                                                                                                |
| Nonfluorenes Oligomers |            | Pure polymer layer | 425, 450            | 0.35                  | 0.94                           | -     | -                         | <i>J. Am. Chem. Soc.</i> , <b>2003</b> , 125, 14032.                                           |

|                          |                                                                                     |                                        |          |                           |                            |                                             |              |                                                                                                                        |
|--------------------------|-------------------------------------------------------------------------------------|----------------------------------------|----------|---------------------------|----------------------------|---------------------------------------------|--------------|------------------------------------------------------------------------------------------------------------------------|
| c-PFBT                   | 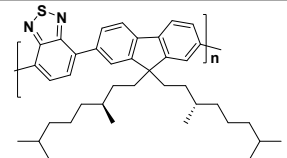   | Pure polymer layer                     | 510      | 0.80                      | 0.12<br>lm W <sup>-1</sup> |                                             | <b>80</b>    | <i>ACS Nano</i> , <b>2017</b> , <i>11</i> , 12713.                                                                     |
| F8BT                     |    | F8BT with chiral semiconducting dopant | 540      | 0.2                       | 1.1<br>lm W <sup>-1</sup>  | -                                           | <b>3000</b>  | <i>Adv. Mater.</i> , <b>2013</b> , <i>25</i> , 2624.                                                                   |
| Chiral Europium Complex  |    | Dispersed in PVK and OXD7              | 595, 612 | 0.03-1.41                 | 0.005                      | <b>0.0042</b>                               | <b>3</b>     | <i>Adv. Mater.</i> , <b>2015</b> , <i>27</i> , 1791.<br><i>Adv. Funct. Mater.</i> , <b>2017</b> , <i>27</i> , 1603719. |
| Platinatehelene          |    | Dispersed in PVK and OXD7              | 625      | 0.38                      | 0.52                       | -                                           | <b>230</b>   | <i>J. Am. Chem. Soc.</i> , <b>2016</b> , <i>138</i> , 9743.                                                            |
| F8BT                     |   | F8BT with chiral R5011                 | 546      | 1.13                      | 4.46                       | -                                           | <b>4000</b>  | <i>Adv. Mater.</i> , <b>2017</b> , <i>29</i> , 1700907.                                                                |
| Chiral Iridium Complexes |  | Dispersed in PVK and OXD7              | 526, 558 | 10 <sup>-3</sup>          | 7.5                        |                                             | <b>4473</b>  | <i>Adv. Optical Mater.</i> , <b>2017</b> , <i>5</i> , 1700359                                                          |
| Chiral Iridium Complexes |  | Dispersed in mCP                       | 495-533  | 0.28~2.6×10 <sup>-3</sup> | -                          | -                                           | -            | <i>Sci. Rep.</i> , <b>2015</b> , <i>5</i> , 14912.                                                                     |
| Chiral AIEgens           |  | Dispersed in mCP                       | 496      | 0.026                     | 24.6                       | <b>9.3 (4.4 at 1000 cd m<sup>-2</sup>)</b>  | <b>2948</b>  | <i>Adv. Funct. Mater.</i> , <b>2018</b> , 1800051.                                                                     |
|                          |                                                                                     | Pure AIEgens                           | 537      | 0.06                      | 10.3                       | <b>3.5</b>                                  | <b>2570</b>  |                                                                                                                        |
| Chiral TADF              |  | Dispersed in mCBP                      | 520      | 1.7~2.3×10 <sup>-3</sup>  | 59.4                       | <b>19.8 (6.3 at 1000 cd m<sup>-2</sup>)</b> | <b>~5000</b> | <i>Angew. Chem. Int. Ed.</i> , <b>2018</b> , <i>57</i> , 1.                                                            |

|                           |                                                                                   |                            |            |                                  |             |                                                   |              |                                                        |
|---------------------------|-----------------------------------------------------------------------------------|----------------------------|------------|----------------------------------|-------------|---------------------------------------------------|--------------|--------------------------------------------------------|
| AIE-active chiral polymer | 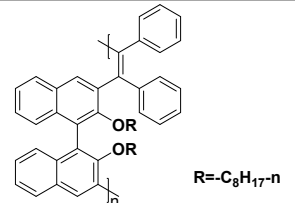 | Pure polymer layer         | 512        | 0.024                            | 0.926       |                                                   | <b>1669</b>  | <i>Chem. Commun.</i> , <b>2018</b> , <i>54</i> , 9663. |
| AIE-active chiral polymer |  | Pure polymer layer         | 534        | $3.2 \times 10^{-3}$             | 1.32        | <b>0.48</b>                                       | <b>8061</b>  | <i>Org. Lett.</i> , <b>2019</b> , <i>21</i> , 439.     |
| CP-TADF molecules         |  | Pure chiral material layer | <b>560</b> | $2.2\text{--}2.9 \times 10^{-3}$ | <b>23.0</b> | <b>6.6</b><br>(5.5 at 1000 cd m <sup>-2</sup> )   | <b>16187</b> | <b>This work</b>                                       |
|                           |                                                                                   | Dispersed in 26DCzPPy      | <b>543</b> | $1.8\text{--}2.3 \times 10^{-3}$ | <b>45.3</b> | <b>12.4</b><br>(11.5 at 1000 cd m <sup>-2</sup> ) | <b>25418</b> | <b>This work</b>                                       |

**Table S2.** Crystal data and structure refinement for (*R/S*)-OBN-DPA.

| Identification code   | ( <i>R</i> )-OBN-DPA                                          | ( <i>S</i> )-OBN-DPA                                          |
|-----------------------|---------------------------------------------------------------|---------------------------------------------------------------|
| CCDC                  | 1896204                                                       | 1896205                                                       |
| Empirical formula     | C <sub>52</sub> H <sub>40</sub> N <sub>4</sub> O <sub>2</sub> | C <sub>52</sub> H <sub>40</sub> N <sub>4</sub> O <sub>2</sub> |
| Formula weight        | 752.92                                                        | 752.92                                                        |
| Temperature/K         | 296(2)                                                        | 296(2)                                                        |
| Crystal system        | Monoclinic                                                    | Monoclinic                                                    |
| Space group           | P2 <sub>1</sub>                                               | P2 <sub>1</sub>                                               |
| a/Å                   | 9.116(2)                                                      | 9.1408(7)                                                     |
| b/Å                   | 12.611(3)                                                     | 12.6631(9)                                                    |
| c/Å                   | 34.215(8)                                                     | 34.540(2)                                                     |
| α/°                   | 90.00                                                         | 90.00                                                         |
| β/°                   | 90.00                                                         | 90.00                                                         |
| γ/°                   | 90.00                                                         | 90.00                                                         |
| Volume/Å <sup>3</sup> | 3933.4(17)                                                    | 3998.1(5)                                                     |

|                                                |                                                             |                                                              |
|------------------------------------------------|-------------------------------------------------------------|--------------------------------------------------------------|
| Z                                              | 66                                                          | 45                                                           |
| $\rho_{\text{calc}}/\text{cm}^3$               | 1.269                                                       | 1.248                                                        |
| $\mu/\text{mm}^{-1}$                           | 0.078                                                       | 0.077                                                        |
| F(000)                                         | 1579.0                                                      | 1578.0                                                       |
| Radiation                                      | MoK $\alpha$ ( $\lambda = 0.71073$ )                        | MoK $\alpha$ ( $\lambda = 0.71073$ )                         |
| 2 $\Theta$ range for data collection/ $^\circ$ | 2.38 to 55.52                                               | 2.36 to 55.04                                                |
| Index ranges                                   | $-9 \leq h \leq 11, -16 \leq k \leq 15, -44 \leq l \leq 43$ | $-11 \leq h \leq 11, -11 \leq k \leq 16, -43 \leq l \leq 44$ |
| Reflections collected                          | 24966                                                       | 27741                                                        |
| Independent reflections                        | 9157 [ $R_{\text{int}} = 0.1018$ ]                          | 9175 [ $R_{\text{int}} = 0.0866$ ]                           |
| Data/restraints/parameters                     | 9157/12/542                                                 | 9175/384/542                                                 |
| Goodness-of-fit on $F^2$                       | 1.021                                                       | 0.980                                                        |
| Final R indexes [ $I \geq 2\sigma(I)$ ]        | R1 = 0.0716, wR2 = 0.1527                                   | R1 = 0.0572, wR2 = 0.1216                                    |
| Final R indexes [all data]                     | R1 = 0.1232, wR2 = 0.1813                                   | R1 = 0.1405, wR2 = 0.1640                                    |
| Largest diff. peak/hole / $e \text{ \AA}^{-3}$ | 0.33/-0.36                                                  | 0.26/-0.26                                                   |
| Flack parameter                                | -1(2)                                                       | 1.2(19)                                                      |

$$R_1^a = \frac{\sum ||F_o| - |F_c||}{\sum F_o}, \quad wR_2^b = \left[ \frac{\sum w(F_o^2 - F_c^2)^2}{\sum w(F_o^2)} \right]^{1/2}$$

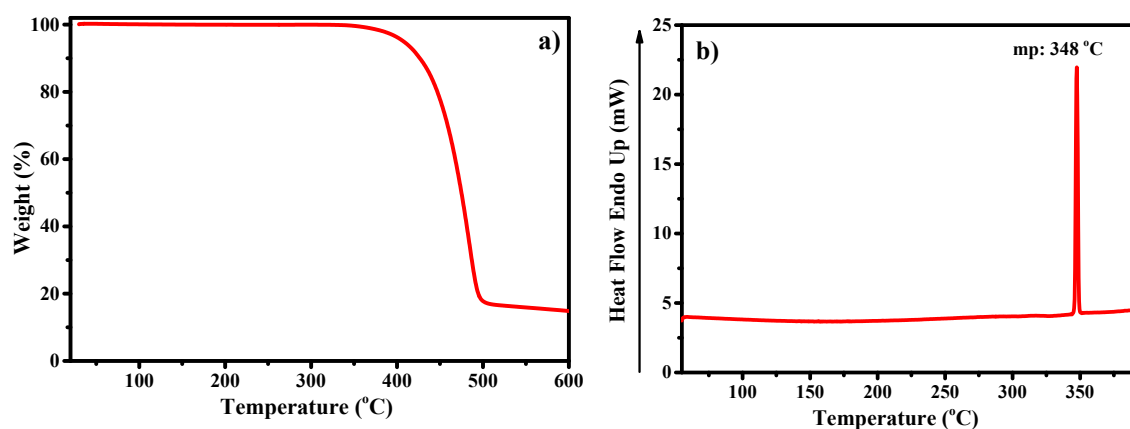

**Fig. S1** TGA (a) and DSC (b) curves of (*R*)-OBN-DPA.



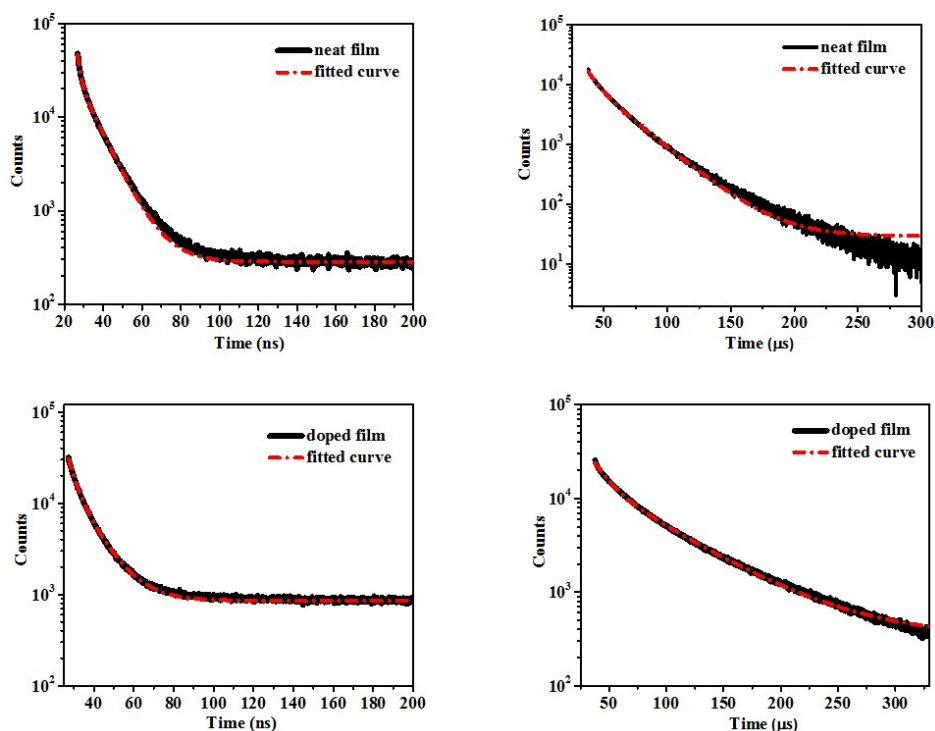

**Fig. S2** The transient PL decay curves for prompt and delayed fluorescence lifetimes of (*R*)-OBN-DPA in neat and doped film.

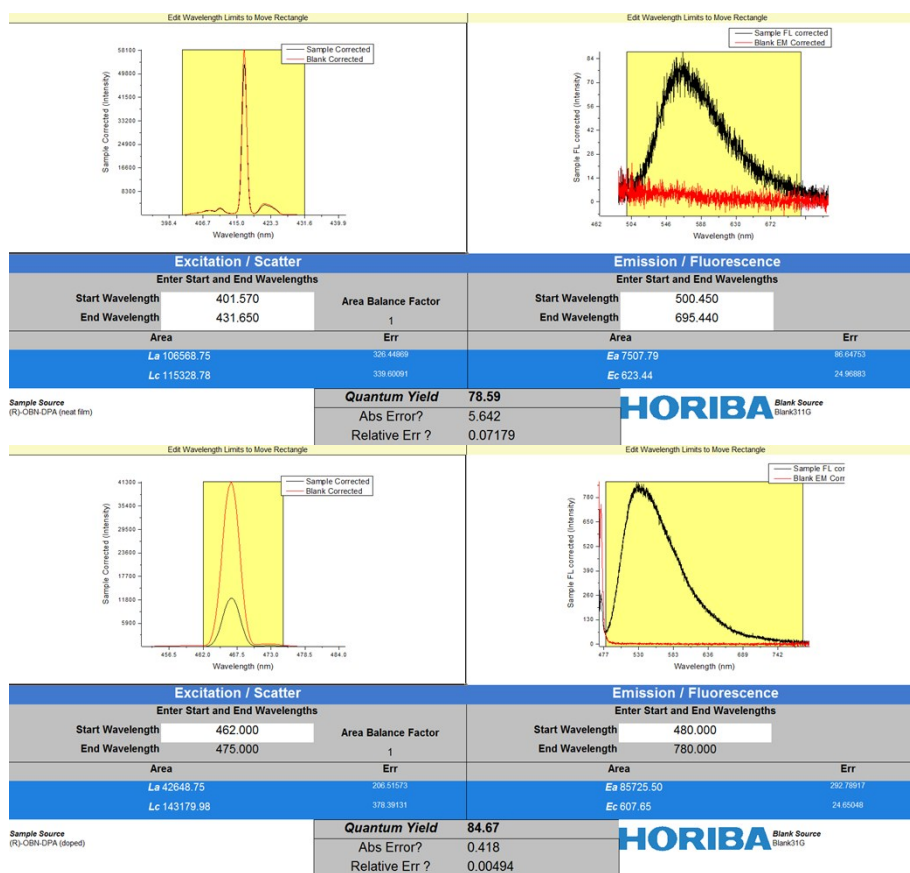

**Fig. S3** The photoluminescence quantum yields (PLQYs) of (*R*)-OBN-DPA in neat and doped film determined by an integer-sphere system.

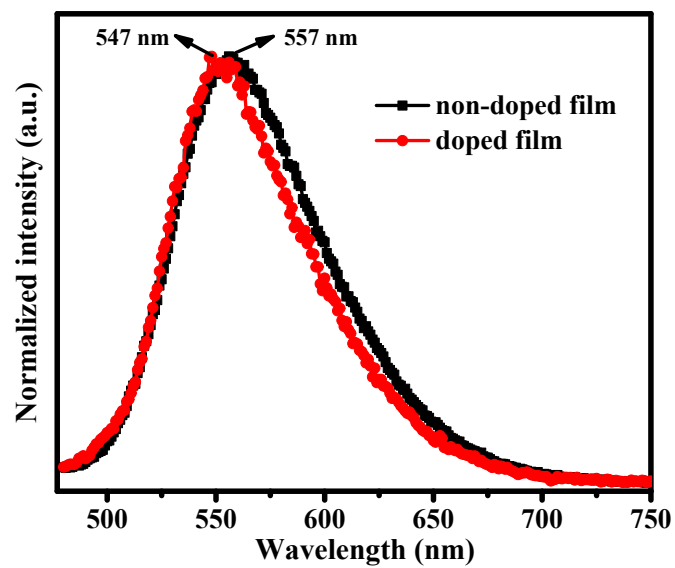

**Fig. S4.** Fluorescence spectra at room temperature of (*R*)-OBNDPA in non-doped and doped films (10% (*R*)-OBNDPA compound in 26DCzPPy).
